# Supplementary material for: Osteopontin and Systemic Lupus Erythematosus Association: A Probable Gene-Gender Interaction
Source: PLoS One. 2008 Mar 12;3(3):e1757. doi: 10.1371/journal.pone.0001757 (PMC2258418; doi:10.1371/journal.pone.0001757)
Supplement: Table S2 — (0.02 MB XLS) [file pone.0001757.s002.xls]

## Sheet: Sheet1
Marker information, genotype and allele distributions of the 11 selected SNPs in cases and controls
SNP	Build 35 position	Location or type	Major/Minor allele	Sample	Controls			Cases			Controls		Cases
					AA	AB	BB	AA	AB	BB	A	B	A	B
rs2728127	89252294	5' near gene	G/A	AA	199	334	164	115	221	94	732	662	451	409
			A/G	EA	656	549	102	351	289	64	1861	753	991	417
rs2853744	89253427	5' near gene	G/T	AA	409	244	46	242	162	28	1062	336	646	218
			G/T	EA	1164	135	8	622	76	4	2463	151	1320	84
rs11730582	89253600	5' near gene	T/C	AA	531	148	17	318	108	7	1210	182	744	122
			T/C	EA	328	647	333	203	330	170	1303	1313	736	670
rs2853749	89254993	intron_0	C/T	AA	261	326	112	158	211	65	848	550	527	341
			C/T	EA	654	550	102	354	287	64	1858	754	995	415
rs11728697	89256120	intron_3	C/T	AA	419	239	41	247	161	25	1077	321	655	211
			T/C	EA	455	624	226	241	330	133	1534	1076	812	596
rs6840362	89257099	intron_3	C/T	AA	316	296	88	177	207	50	928	472	561	307
			C/T	EA	642	557	107	390	260	51	1841	771	1040	362
rs6811536	89259584	intron_4	C/T	AA	251	330	118	139	221	69	832	566	499	359
			C/T	EA	618	573	115	369	272	60	1809	803	1010	392
rs10516799	89260372	intron_5	G/C	AA	320	299	80	184	200	49	939	459	568	298
			G/C	EA	618	574	116	370	273	59	1810	806	1013	391
rs1126616	89261032	exon_6	C/T	AA	464	213	23	274	139	21	1141	259	687	181
			C/T	EA	697	515	96	351	303	52	1909	707	1005	407
rs1126772	89261365	3' UTR	A/G	AA	619	77	4	389	42	2	1315	85	820	46
			A/G	EA	801	444	63	424	253	29	2046	570	1101	311
rs9138	89261521	3' UTR	A/C	AA	465	212	23	275	137	20	1142	258	687	177
			A/C	EA	696	515	96	350	303	49	1907	707	1003	401
A major allele and B minor allele
